# Supplementary material for: DGCR8 is essential for microRNA biogenesis and silencing of embryonic stem cell self-renewal
Source: Springer Nature journal article supplement (doi:10.1038/ng1969), 2007-01-28
Supplement: 41588_2007_BFng1969_MOESM68_ESM.pdf [file 41588_2007_BFng1969_MOESM68_ESM.pdf]

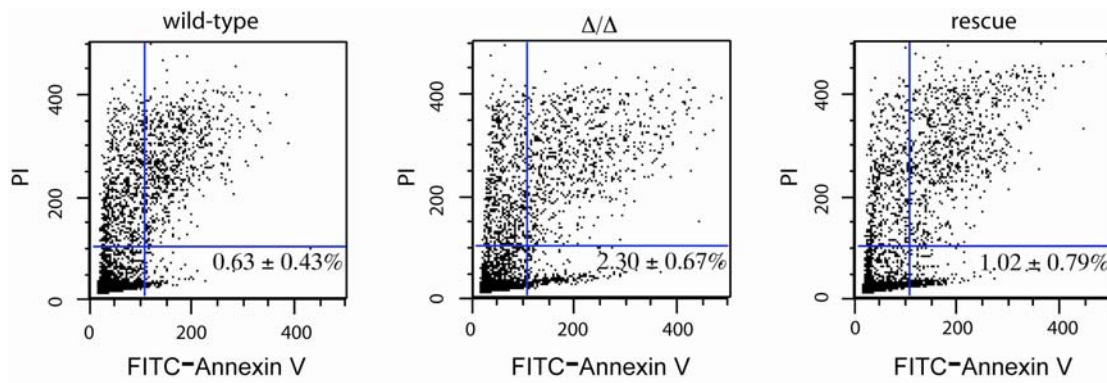

**Supplementary Figure 2.** Analysis of apoptosis in wild-type, DGCR8 knockout and DGCR8 rescued ES cells. Percentage of PI negative and Annexin V positive cells (early apoptosis) of each cell type is indicated. Percentages represent two independent experiments in which cells were plated and assayed in triplicate.
