# Supplementary material for: DGCR8 is essential for microRNA biogenesis and silencing of embryonic stem cell self-renewal
Source: Springer Nature journal article supplement (doi:10.1038/ng1969), 2007-01-28
Supplement: 41588_2007_BFng1969_MOESM69_ESM.pdf [file 41588_2007_BFng1969_MOESM69_ESM.pdf]

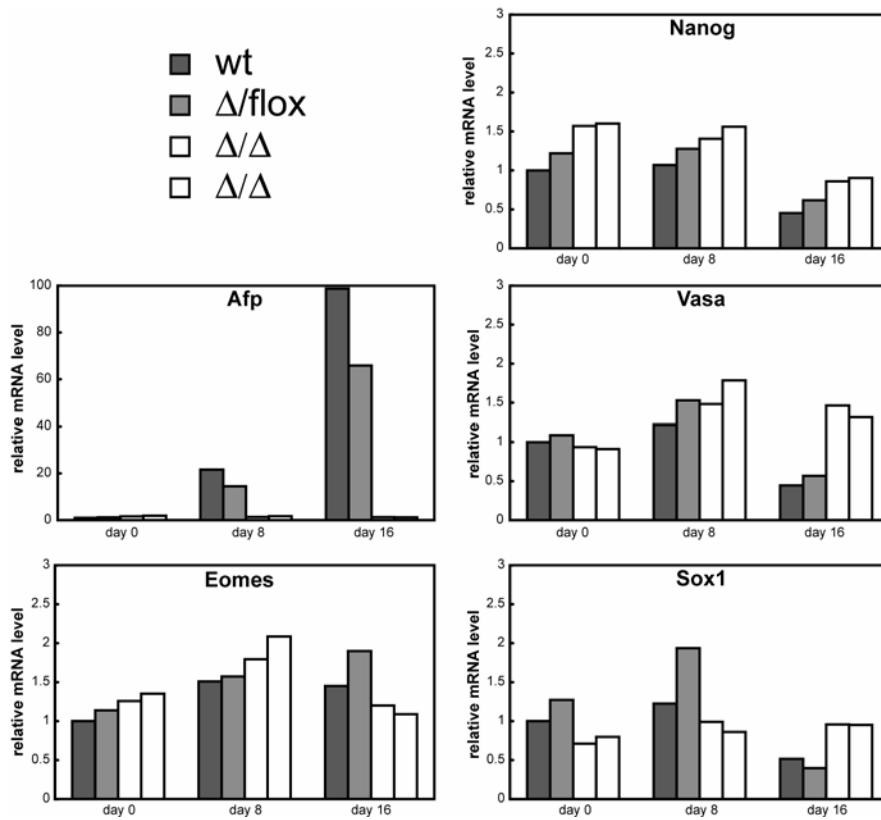

**Supplementary Figure 3.** Quantitative real-time PCR analysis of Nanog (pluripotency maker), Afp (visceral endoderm), Vasa (germline), Eomes (trophoblast), and Sox1 (ectoderm) following EB differentiation at 0, 8 and 16 days. DGCR8 knockout ES cells show grossly abnormal differentiation toward different lineages. However, slight preference toward certain lineages (germ line indicated by Vasa, epithelium indicated by K18) and strong disfavor toward other lineages (visceral endoderm indicated by Afp; mesoderm indicated by T-brachyury (see Fig. 4)) are observed.
