# Supplementary material for: DGCR8 is essential for microRNA biogenesis and silencing of embryonic stem cell self-renewal
Source: Springer Nature journal article supplement (doi:10.1038/ng1969), 2007-01-28
Supplement: 41588_2007_BFng1969_MOESM71_ESM.pdf [file 41588_2007_BFng1969_MOESM71_ESM.pdf]

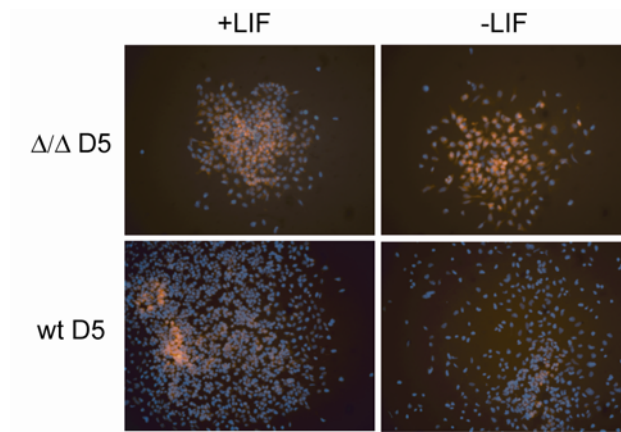

**Supplementary Figure 5.** Colony differentiation assay (see text and **Fig. 5d** for details). Morphology of representative colonies stained with AP (red) and DAPI (blue).
