# Supplementary material for: DGCR8 is essential for microRNA biogenesis and silencing of embryonic stem cell self-renewal
Source: Springer Nature journal article supplement (doi:10.1038/ng1969), 2007-01-28
Supplement: 41588_2007_BFng1969_MOESM72_ESM.pdf [file 41588_2007_BFng1969_MOESM72_ESM.pdf]

| miRNA     | $\Delta/\text{flox}$ , AF3 | $\Delta/\text{flox}$ , AF5 | $\Delta/\text{flox}$ , AF3 | $\Delta/\Delta 1$ , AF3 | $\Delta/\Delta 1$ , AF5 | $\Delta/\Delta 2$ , AF3 | $\Delta/\Delta 2$ , AF5 |
|-----------|----------------------------|----------------------------|----------------------------|-------------------------|-------------------------|-------------------------|-------------------------|
| let7a-1   |                            | 1.0567                     | 1.1140                     | 0.9804                  | 0.7950                  | 1.3557                  | 0.5581                  |
| let7b     |                            | 1.0494                     | 1.3609                     | 0.9650                  | 0.6634                  | 1.2143                  | 0.6006                  |
| let7e     | 1.3765                     | 1.2991                     | 2.0792                     | 0.8455                  | 0.6671                  | 0.6149                  | 0.3272                  |
| miR101-1  | 0.8775                     | 0.7350                     | 1.5798                     | 0.0176                  | 0.0139                  | 0.0408                  | 0.0129                  |
| miR103-1  | 0.8574                     | 1.0374                     | 1.0046                     | 0.0075                  | 0.0094                  | 0.0083                  | 0.0074                  |
| miR106a   | 1.0217                     | 1.0741                     | 0.9124                     | 0.0033                  | 0.0044                  | 0.0060                  | 0.0040                  |
| miR106b   | 1.1378                     | 1.1562                     | 1.0242                     | 0.0583                  | 0.0286                  | 0.0678                  | 0.0692                  |
| miR107    | 0.9203                     | 1.0197                     | 1.0064                     | 0.0068                  | 0.0094                  | 0.0102                  | 0.0111                  |
| miR124a-1 | 0.7483                     | 1.0058                     | 1.1574                     | 0.0074                  | 0.0094                  | 0.0273                  | 0.0163                  |
| miR125a   |                            | 1.8764                     | 0.8615                     | 0.0242                  | 0.0307                  | 0.0276                  | 0.0123                  |
| miR126*   | 1.1752                     | 1.2308                     | 0.7070                     | 1.9278                  | 1.7147                  | 2.7966                  | 2.0404                  |
| miR127    | 0.7146                     | 0.8739                     | 1.1250                     | 0.0052                  | 0.0083                  | 0.0086                  | 0.0030                  |
| miR128a   |                            | 0.8415                     | 0.8181                     | 0.0233                  | 0.0117                  | 0.0456                  | 0.0032                  |
| miR130a   | 0.8889                     | 1.0204                     | 0.9173                     | 0.0039                  | 0.0064                  | 0.0080                  | 0.0046                  |
| miR130b   | 0.8787                     | 1.0832                     | 1.0455                     | 0.0149                  | 0.0167                  | 0.0292                  | 0.0164                  |
| miR134    | 0.5902                     | 0.7796                     | 0.7545                     | 0.0197                  | 0.0273                  | 0.0565                  | 0.0257                  |
| miR141    | 0.5678                     | 0.7736                     | 1.1174                     | 0.0164                  | 0.0134                  | 0.1124                  | 0.0989                  |
| miR148a   |                            | 1.2263                     |                            | -0.0153                 | 0.0178                  | 0.0613                  | 0.0494                  |
| miR149    |                            | 1.3728                     |                            | 0.0101                  | 0.0433                  | 0.0993                  | 0.0903                  |
| miR150    |                            | 1.4201                     | 1.6969                     | 0.0140                  | 0.0113                  | 0.0459                  | 0.0152                  |
| miR15a    | 0.9415                     | 0.8731                     | 0.9469                     | 0.0111                  | 0.0193                  | 0.0353                  | 0.0154                  |
| miR15b    | 1.7738                     | 1.2503                     | 0.9490                     | 0.0037                  | 0.0055                  | 0.0124                  | 0.0032                  |
| miR16-1   | 1.0681                     | 0.9752                     | 1.1325                     | 0.0043                  | 0.0064                  | 0.0119                  | 0.0049                  |
| miR17-3p  | 0.9390                     | 1.0333                     | 0.9764                     | 0.0044                  | 0.0064                  | 0.0217                  | 0.0022                  |
| miR17-5p  | 1.2117                     | 0.8135                     | 1.0388                     | 0.0029                  | 0.0061                  | 0.0061                  | 0.0037                  |
| miR18     | 1.0268                     | 1.0554                     | 1.2685                     | 0.0067                  | 0.0034                  | 0.0152                  | 0.0180                  |
| miR181b-1 |                            | 1.2610                     |                            | 0.0258                  | 0.0168                  | 0.0327                  | 0.0297                  |
| miR182    | 0.6328                     | 1.0255                     | 0.7421                     | 0.0063                  | 0.0050                  | 0.0106                  | 0.0040                  |
| miR183    | 0.7438                     | 0.8572                     | 0.8400                     | 0.0060                  | 0.0053                  | 0.0089                  | 0.0065                  |
| miR191    | 1.0554                     | 1.0196                     | 1.1186                     | 0.0515                  | 0.0669                  | 0.0916                  | 0.0608                  |
| miR195    | 0.9926                     | 0.9975                     | 0.7826                     | 0.0065                  | 0.0090                  | 0.0193                  | 0.0053                  |
| miR19a    | 0.8233                     | 1.3617                     | 1.0604                     | 0.0065                  | 0.0049                  | 0.0093                  | 0.0291                  |
| miR20     | 0.7607                     | 1.1058                     | 1.0642                     | 0.0026                  | 0.0039                  | 0.0063                  | 0.0119                  |
| miR200b   | 0.5611                     | 1.0333                     |                            | 0.0000                  | 0.0079                  | 0.0198                  | 0.0406                  |
| miR21     | 0.7583                     | 0.8406                     | 1.4026                     | 0.0214                  | 0.0338                  | 0.0114                  | 0.0065                  |
| miR210    | 0.7708                     | 0.8119                     | 1.4347                     | 0.0314                  | 0.0246                  | 0.0470                  | 0.0307                  |
| miR22     | 0.5662                     | 0.6970                     | 1.2661                     | 0.0308                  | 0.0380                  | 0.0152                  | -0.0006                 |
| miR23a    | 0.9126                     | 2.8565                     | 0.3981                     | 0.0131                  | 0.0308                  | 0.0106                  | 0.0065                  |
| miR23b    | 0.8805                     | 1.4936                     | 0.6026                     | 0.0180                  | 0.0366                  | 0.0073                  | 0.0056                  |
| miR24-1   | 1.2190                     | 1.0174                     | 1.2750                     | 0.0347                  | 0.0443                  | 0.0253                  | 0.0163                  |
| miR25     | 1.0530                     | 1.0288                     | 0.6735                     | 0.0112                  | 0.0104                  | 0.0146                  | 0.0158                  |
| miR26a-1  | 1.0287                     | 1.0584                     | 1.6180                     | 0.0316                  | 0.0210                  | 0.0228                  | 0.0132                  |
| miR27a    | 1.7107                     | 1.0470                     | 1.1171                     | 0.0298                  | 0.0248                  | 0.0401                  | 0.0056                  |
| miR28     |                            |                            | 0.8176                     | 0.0230                  | 0.0211                  | 0.0651                  | 0.0157                  |
| miR290    | 0.7063                     | 0.7572                     | 1.0121                     | 0.0033                  | 0.0365                  | 0.0062                  | 0.0086                  |
| miR291-3p | 0.8711                     | 0.7593                     | 1.1331                     | 0.0026                  | 0.0049                  | 0.0054                  | 0.0033                  |
| miR291-5p | 0.7331                     | 0.7471                     | 1.1023                     | 0.0062                  | 0.0110                  | 0.0136                  | 0.0126                  |
| miR292-3p | 0.8267                     | 0.7572                     | 1.0629                     | 0.0036                  | 0.0105                  | 0.0079                  | 0.0046                  |
| miR292-5p | 0.7892                     | 0.7975                     | 1.0586                     | 0.0029                  | 0.0078                  | 0.0059                  | 0.0043                  |
| miR293    | 0.7520                     | 0.7572                     | 1.0881                     | 0.0026                  | 0.0077                  | 0.0055                  | 0.0041                  |
| miR294    | 0.8509                     | 0.8274                     | 1.7982                     | 0.0039                  | 0.0105                  | 0.0078                  | 0.0059                  |
| miR295    | 0.8178                     | 0.8021                     | 0.9897                     | 0.0028                  | 0.0060                  | 0.0053                  | 0.0036                  |
| miR296    | 0.9191                     |                            | 1.2733                     | 0.0491                  | 0.0555                  | 0.2308                  | 0.1022                  |
| miR297-1  | 1.1101                     |                            | 1.2661                     | 0.0072                  | 0.0045                  | 0.0308                  | 0.0065                  |
| miR298    | 0.7802                     | 0.8799                     | 1.0582                     | 0.0176                  | 0.0255                  | 0.0690                  | 0.0374                  |
| miR299    |                            | 0.8156                     | 0.6208                     | 0.0279                  | 0.0191                  | 0.0484                  | 0.0094                  |
| miR300    | 0.7217                     | 0.6037                     | 0.8375                     | 0.0084                  | 0.0068                  | 0.0184                  | 0.0120                  |
| miR301    | 1.1936                     | 0.6136                     | 1.2120                     | 0.0096                  | 0.0100                  | 0.0179                  | 0.0128                  |
| miR302a   |                            |                            | 5.4510                     | 0.0119                  | 0.0125                  | 0.0397                  | 0.0243                  |
| miR30a-5p | 1.1856                     | 1.1815                     | 1.3019                     | 0.0128                  | 0.0138                  | 0.0170                  | 0.0172                  |
| miR30b    |                            | 1.1422                     | 1.1115                     | 0.0115                  | 0.0078                  | 0.0246                  | 0.0023                  |
| miR31     | 0.7699                     | 0.7951                     | 1.2259                     | 0.1000                  | 0.1109                  | 0.1114                  | 0.1172                  |
| miR320    | 0.9936                     | 1.2637                     | 1.1913                     | 2.5940                  | 2.4569                  | 3.0853                  | 2.8822                  |
| miR323    | 1.1690                     | 0.7617                     | 0.7385                     | 0.1344                  | 0.1006                  | 0.1909                  | 0.1237                  |
| miR329    | 0.5864                     | 0.9357                     | 0.6730                     | 0.0078                  | 0.0143                  | 0.0087                  | 0.0060                  |

| <b>Supplementary Table 1. Continued</b> |        |        |        |        |        |        |        |
|-----------------------------------------|--------|--------|--------|--------|--------|--------|--------|
| miR335                                  | 1.3747 | 1.1121 | 1.1616 | 0.1105 | 0.0597 | 0.0829 | 0.0402 |
| miR337                                  | 0.9250 | 0.8398 |        | 0.0115 | 0.0058 | 0.0153 | 0.0065 |
| miR341                                  | 0.4933 | 0.5078 | 0.3325 | 0.0967 | 0.4217 | 0.0819 | 0.1161 |
| miR342                                  |        | 1.2445 | 1.1767 | 0.0415 | 0.0061 | 0.0316 | 0.0078 |
| miR350                                  |        | 1.5107 |        | 0.0111 | 0.0097 | 0.0241 | 0.0036 |
| miR361                                  | 1.1965 | 0.9139 |        | 0.0577 | 0.0488 | 0.1430 | 0.0351 |
| miR370                                  | 0.9156 | 0.8108 | 0.7846 | 0.0161 | 0.0210 | 0.0836 | 0.1030 |
| miR371                                  | 0.4892 | 0.6978 | 1.3345 | 0.0062 | 0.0075 | 0.0452 | 0.0139 |
| miR373*                                 |        |        |        | 0.0192 | 0.0561 | 0.0677 | 0.0336 |
| miR376a                                 | 0.4715 | 0.5632 | 1.3897 | 0.0057 | 0.0088 | 0.0120 | 0.0007 |
| miR376b                                 | 1.3450 | 0.8079 | 1.5489 | 0.0070 | 0.0042 | 0.0124 | 0.0051 |
| miR380                                  |        | 0.9783 |        | 0.0196 | 0.0118 | 0.0330 | 0.0246 |
| miR381                                  | 0.4567 | 0.8985 | 0.4688 | 0.0093 | 0.0142 | 0.0171 | 0.0158 |
| miR382                                  | 0.7656 | 0.7241 | 0.8918 | 0.0169 | 0.0175 | 0.0420 | 0.0229 |
| miR409                                  | 0.7200 | 0.8383 | 0.6778 | 0.0086 | 0.0068 | 0.0102 | 0.0054 |
| miR410                                  | 0.7044 | 0.7831 | 1.1479 | 0.0245 | 0.0210 | 0.0207 | 0.0136 |
| miR411                                  |        | 0.6402 | 1.3791 | 0.0129 | 0.0050 | 0.0120 | 0.0020 |
| miR423                                  | 1.1198 | 0.9509 | 0.9275 | 0.1177 | 0.2263 | 0.1984 | 0.1783 |
| miR7-1                                  | 0.9374 | 1.0795 | 0.7295 | 0.0280 | 0.0071 | 0.0365 | 0.0128 |
| miR92-1                                 | 1.0881 | 1.0992 | 0.9741 | 0.0035 | 0.0055 | 0.0071 | 0.0045 |
| miR93                                   | 1.2800 | 0.9109 | 1.2233 | 0.0058 | 0.0048 | 0.0158 | 0.0107 |
| miR96                                   | 1.0215 | 1.0481 | 1.0207 | 0.0262 | 0.0215 | 0.0357 | 0.0233 |
| miR99a                                  | 0.7827 | 0.9020 | 1.1350 | 1.0043 | 0.9963 | 0.9945 | 0.8061 |
| miR99b                                  | 0.9485 | 1.0256 | 0.9978 | 1.0235 | 0.8326 | 0.8450 | 0.6858 |

**Supplementary Table 1.** Ratios of miRNA expression for  $\Delta$ /flox and  $\Delta$ / $\Delta$  relative to wild-type. Shown are ratios of 89 miRNAs that are depicted in **Fig. 3c, d**. Microarrays for microRNAs from  $\Delta$ /flox cell line and two independent  $\Delta$ / $\Delta$  cell lines were performed. Arrays were done in duplicate or triplicate as indicated. AF3 and AF5 indicate dyes that were used to label  $\Delta$ /flox or  $\Delta$ / $\Delta$  RNA samples. In each experiment, RNA samples from wild-type cells were labeled with reverse dye and co-hybridized to the same microarray.
