# Supplementary material for: DGCR8 is essential for microRNA biogenesis and silencing of embryonic stem cell self-renewal
Source: Springer Nature journal article supplement (doi:10.1038/ng1969), 2007-01-28
Supplement: 41588_2007_BFng1969_MOESM73_ESM.pdf [file 41588_2007_BFng1969_MOESM73_ESM.pdf]

| Embryonic day | Normal implants | Abnormal implants | Total | Abnormal/total |
|---------------|-----------------|-------------------|-------|----------------|
| E6.5          | 17              | 5 <sup>A</sup>    | 22    | 0.227          |
| E10           | 7               | 2 <sup>B</sup>    | 9     | 0.222          |
| E12           | 5               | 2 <sup>B</sup>    | 7     | 0.286          |

<sup>A</sup> Grossly malformed embryos, DGCR8 knockout genotype confirmed by PCR

<sup>B</sup> Uterine implants with no evidence of an embryo

**Supplemental Table 2.** Ratio of abnormal implants from DGCR8 wt/ $\Delta$   $\times$  wt/ $\Delta$  crosses at different time points in embryonic development. Observed ratios of abnormal to total implants are very close to expected frequency of 0.25 for  $\Delta/\Delta$  embryos. At E6.5 malformed embryos were identified within implants and confirmed as DGCR8 homozygous knockouts by PCR genotyping. No embryonic tissue was identifiable at later time points suggesting early lethality followed by resorption.
