# Supplementary material for: DGCR8 is essential for microRNA biogenesis and silencing of embryonic stem cell self-renewal
Source: Springer Nature journal article supplement (doi:10.1038/ng1969), 2007-01-28
Supplement: 41588_2007_BFng1969_MOESM74_ESM.pdf [file 41588_2007_BFng1969_MOESM74_ESM.pdf]

| Probes to      | Sequences                                   |
|----------------|---------------------------------------------|
| mir-130        | 5'-ATGCCCTTTTAAACATTGCACTG-3'               |
| mir-293        | 5'-ACACTACAAACTCTGCGGCACT-3'                |
| mir-294        | 5'-ACACACAAAAGGGAAGCACTTT-3'                |
| U6 snRNA       | 5'-GCTTCACGAATTTGCGTGTCATCCT-3'             |
|                |                                             |
| Gene           | Primer sequences                            |
| Oct4           | Forward: 5'-GTTGTTTTGTTTTGGTTTTGGATAT-3'    |
|                | Reverse: 5'-ATGGGTTGAAATATTGGGTTTATTTA-3'   |
| Nanog          | Forward: 5'-GCTCAGCACCAAGTGGAGTATCC-3'      |
|                | Reverse: 5'-TCCAGATGCGTTCACCAGATAG-3'       |
| Fgf5           | Forward: 5'-TGCATCTGCTCTGCTCTAAGAAA-3'      |
|                | Reverse: 5'-TCATCACATTCCCGAATTAAGCT-3'      |
| T-brachyury    | Forward: 5'-CTGGGAGCTCAGTTCTTTCTGA-3'       |
|                | Reverse: 5'-GAGGACGTGGCAGCTGAGA-3'          |
| Hnf4           | Forward: 5'-CAGACGTCCTCCTTTCTTGTGATA-3'     |
|                | Reverse: 5'-TGTTTGGTGTGAAGGTCATGATTA-3'     |
| Keratin 18     | Forward: 5'-CGCTTGCTGGAGGATGGA-3'           |
|                | Reverse: 5'-CTTCTGCACAGTTTGCATGGA-3'        |
| Afp            | Forward: 5'-TGAAGCAAGCCCTGTGAACTC-3'        |
|                | Reverse: 5'-TCAGAAAAGTGGTGTGATGCATAGC-3'    |
| Vasa           | Forward: 5'-GACCTTCCTTCTACCATTGATGAGTAT-3'  |
|                | Reverse: 5'-TCGCTCTGCCAGTATTTCCA-3'         |
| Eomes          | Forward: 5'-CCTCCGTAAGTCTTCTACACACTT-3'     |
|                | Reverse: 5'-AAAGCCTATAGGAACTGTGACATCATAC-3' |
| Sox1           | Forward: 5'-TGAAGGAACACCCGGATTACA-3'        |
|                | Reverse: 5'-GCCAGCGAGTACTTGTCTTCT-3'        |
| $\beta$ -Actin | Forward: 5'-CACAGCTTCTTTGCAGCTCCTT-3'       |
|                | Reverse: 5'-CGTCATCCATGGCGAACTG-3'          |

**Supplementary Table 3.** Sequences of probes used in Northern analysis and primers used in quantitative real-time PCR.
