# Supplementary figures and images for: DGCR8 is essential for microRNA biogenesis and silencing of embryonic stem cell self-renewal
Source: Springer Nature journal article supplement (doi:10.1038/ng1969), 2007-01-28

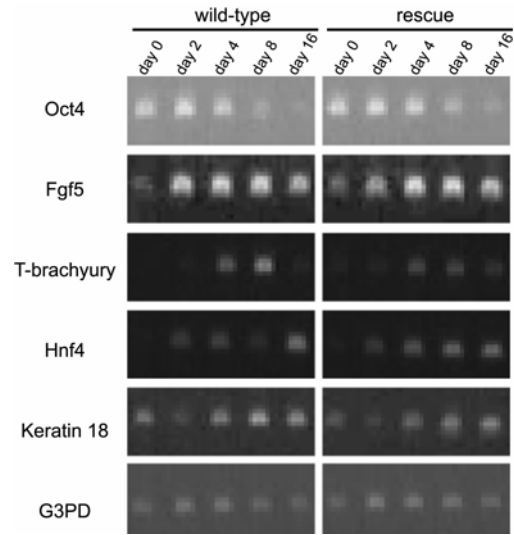

**Supplementary Figure 4.** Semi-quantitative RT-PCR analysis of wild-type and rescued ES cells.

Supplement: 41588_2007_BFng1969_MOESM70_ESM.pdf [file 41588_2007_BFng1969_MOESM70_ESM.pdf]
